# Supplementary material for: APC Splicing Mutations Leading to In-Frame Exon 12 or Exon 13 Skipping Are Rare Events in FAP Pathogenesis and Define the Clinical Outcome
Source: MDPI journal article supplement (doi:10.3390/genes12030353), 2021-02-28
Supplement: s1 [file s1]

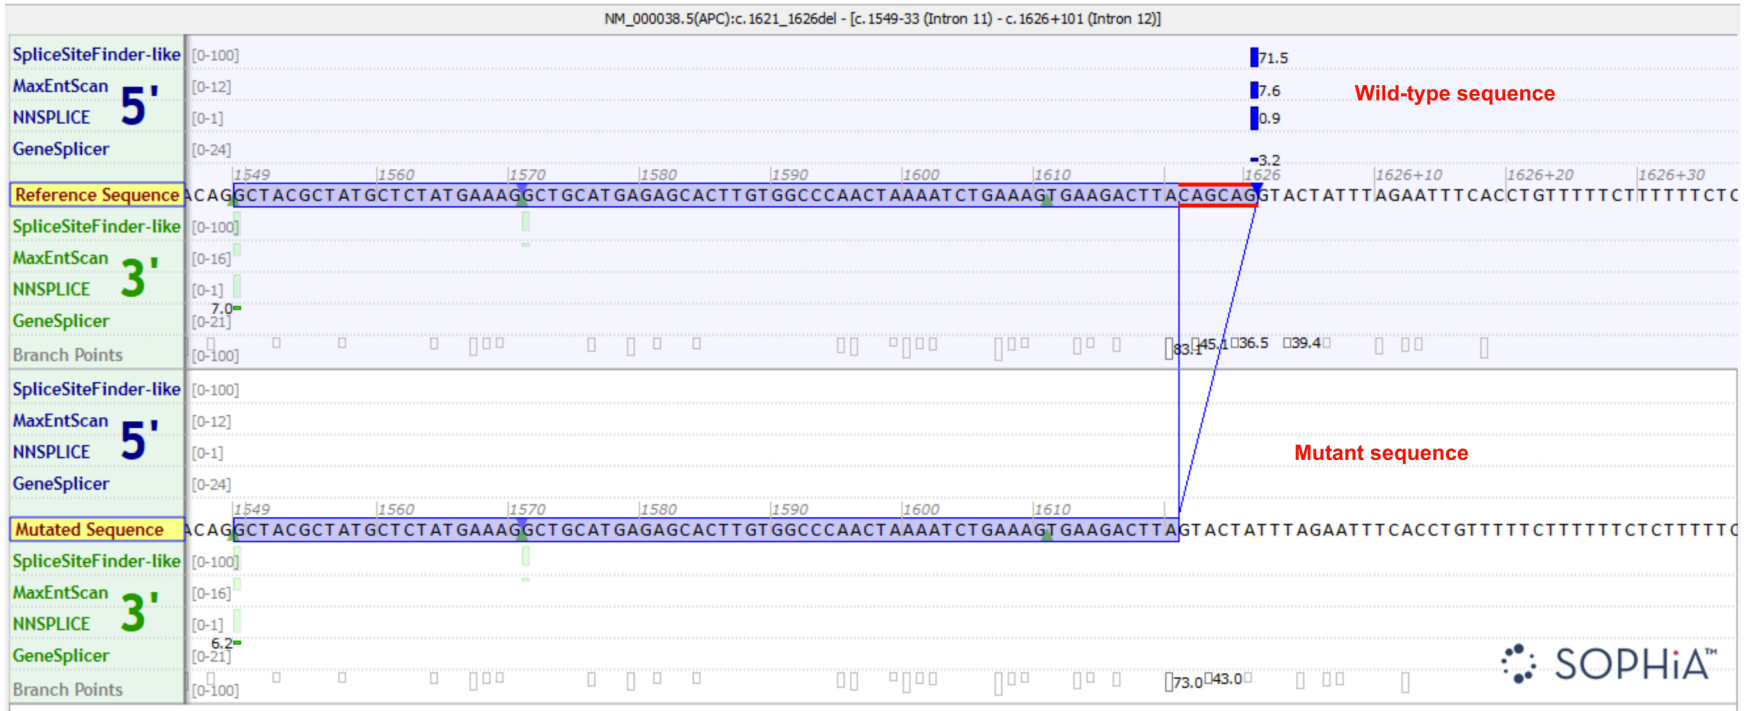

## Donor Sites

|                    | SSF<br>[0-100]        | MaxEnt<br>[0-12]     | NNSPLICE<br>[0-1]    | GeneSplicer<br>[0-24] |
|--------------------|-----------------------|----------------------|----------------------|-----------------------|
| <i>Threshold</i>   | $\geq 70$             | $\geq 0$             | $\geq 0.4$           | $\geq 0$              |
| Exon 12 – c.1626 N | 71.49 $\Rightarrow$ — | 7.64 $\Rightarrow$ — | 0.90 $\Rightarrow$ — | 3.17 $\Rightarrow$ —  |
